# Supplementary material
Source: publisher site journal article supplement (https://www.spandidos-publications.com/3974/downloadSupplementary)

Figure S1. Expression level of TRAF6 in MCF-7 and NHDF cells. Cells were cultured in a 60-mm plate. When the confluence of the cells reached 60-70%, the cells were collected. Western blot analysis was performed to detect the expression level of TRAF6 in MCF-7 and NHDF cells. The results shown are the mean  $\pm$  SD of three independent experiments. \* $P < 0.05$  vs. control group. TRAF6, TNF receptor-associated factor 6.

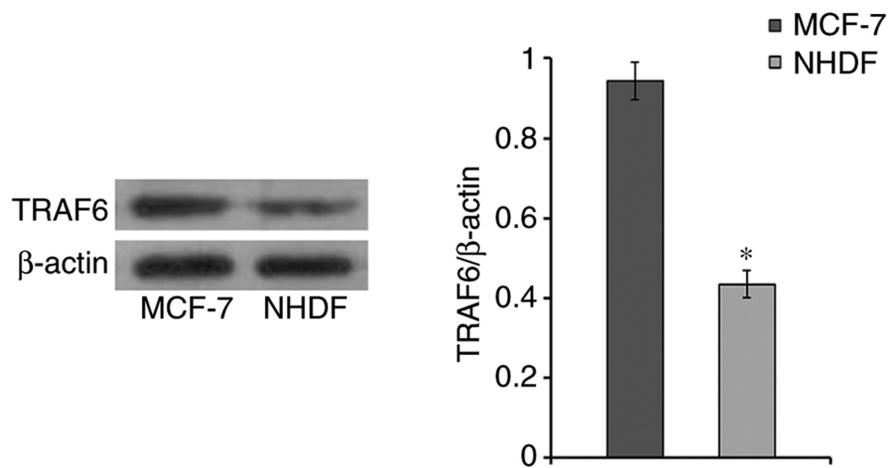

Supplement: Supplementary file 1 [file downloadSupplementary]
